# Supplementary material for: Micrometric Wrinkled Patterns Spontaneously Formed on Hydrogel Thin Films via Argon Plasma Exposure
Source: MDPI journal article supplement (doi:10.3390/molecules24040751), 2019-02-19
Supplement: s1 [file s1]

## Supplementary Materials

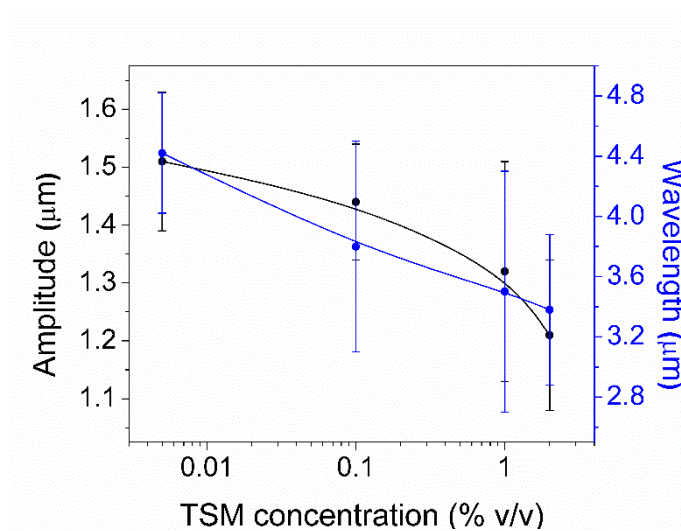

**Figure S1.** Amplitude and wavelength of the wrinkled patterns obtained by using different concentrations of TSM (0.005 %, 0.1 %, 1 %, and 2 % v/v) during functionalization process.
